# Supplementary material for: Spatio-molecular domains identified in the mouse subthalamic nucleus and neighboring glutamatergic and GABAergic brain structures
Source: PubMed Central journal article supplement (PMC7334224; doi:10.1038/s42003-020-1028-8), 2020-07-03
Supplement: 42003_2020_1028_MOESM2_ESM.pdf [file 42003_2020_1028_MOESM2_ESM.pdf]

**Supplementary Data 1:** Differential expression analysis. Table (excel format) showing data obtained by the Model-based Analysis of Single-cell Transcriptomics (MAST) method. Each cluster was compared versus the rest using a p adjusted value of  $<0.01$ .

**Supplementary Data 2:** Differential expression analysis. Table (excel format) showing data obtained by the Model-based Analysis of Single-cell Transcriptomics (MAST) method comparing specific clusters.

**Supplementary Data 3:** Source data underlying Figures 1 and 2.
